# Supplementary material for: Social integration and mental health of Somali refugees in the Netherlands: the role of perceived discrimination
Source: Springer Nature journal article supplement (doi:10.1186/s12889-022-14655-y), 2022-11-29
Supplement: MOESM1 [file 23769068]

Appendix A. Descriptive statistics after multiple imputation and weighting.

|                                        | Mean / % | (SD)   | Allowable range |
|----------------------------------------|----------|--------|-----------------|
| Mental health (alternative SF-12)      | 75.7     | (18.0) | 0-100           |
| Dutch language proficiency             | 6.9      | (2.0)  | 3-10            |
| Informal contact w/ natives            | 2.9      | (1.7)  | 0-6             |
| Perceived discrimination               | 1.9      | (1.1)  | 1-5             |
| Female                                 | 45.0%    |        |                 |
| Age:                                   |          |        |                 |
| 15-24                                  | 16.6%    |        |                 |
| 25-34                                  | 35.4%    |        |                 |
| 35-44                                  | 22.4%    |        |                 |
| 45 and older                           | 25.5%    |        |                 |
| Educational attainment                 |          |        |                 |
| Primary or less                        | 40.5%    |        |                 |
| Lower secondary                        | 27.4%    |        |                 |
| Higher secondary or tertiary           | 32.0%    |        |                 |
| Partner in the Netherlands             | 35.2%    |        |                 |
| Has children                           | 59.5%    |        |                 |
| Employed                               | 22.9%    |        |                 |
| Length of stay in years                | 12.3     | (7.9)  | 1-64            |
| Identification w/ Somalia              | 87.7%    |        |                 |
| Identification w/ Netherlands          | 43.0%    |        |                 |
| Frequent attendance religious services | 42.1%    |        |                 |

*Notes: Data are from Survey Integration Minorities 2015; n=417; Data are weighted; Multiple imputation using chained equations used to deal with missing data.*

Appendix B. Results of linear regression model of perceived discrimination.

|                                        | B        | (SE)    |
|----------------------------------------|----------|---------|
| Dutch language proficiency             | 0.076*   | (0.033) |
| Informal contact w/ natives            | 0.027    | (0.031) |
| Female                                 | 0.021    | (0.116) |
| Age:                                   |          |         |
| 15-24                                  | Ref.     |         |
| 25-34                                  | -0.204   | (0.173) |
| 35-44                                  | -0.308   | (0.211) |
| 45 and older                           | -0.392†  | (0.226) |
| Educational attainment                 |          |         |
| Primary or less                        | Ref.     |         |
| Lower secondary                        | 0.088    | (0.131) |
| Higher secondary or tertiary           | 0.298*   | (0.142) |
| Partner in the Netherlands             | -0.244*  | (0.119) |
| Has children                           | -0.019   | (0.134) |
| Employed                               | 0.093    | (0.134) |
| Length of stay (log)                   | 0.238*   | (0.098) |
| Identification w/ Somalia              | 0.031    | (0.156) |
| Identification w/ Netherlands          | -0.115   | (0.105) |
| Frequent attendance religious services | -0.063   | (0.113) |
| Constant                               | 1.008*** | (0.294) |
| R <sup>2</sup>                         | .135     |         |

*Notes: Data are from Survey Integration Minorities 2015; n=417; Data are weighted; Multiple imputation using chained equations used to deal with missing data.*

†  $p < .1$ , \*  $p < .05$ , \*\*  $p < .01$ , \*\*\*  $p < .001$
